# Supplementary material for: Identification of Conus amadis disulfide isomerase: minimum sequence length of peptide fragments necessary for protein annotation
Source: Royal Society of Chemistry journal article supplement (doi:10.1039/b705382g), 2007-06-27
Supplement: b705382g.pdf [file b705382g.pdf]

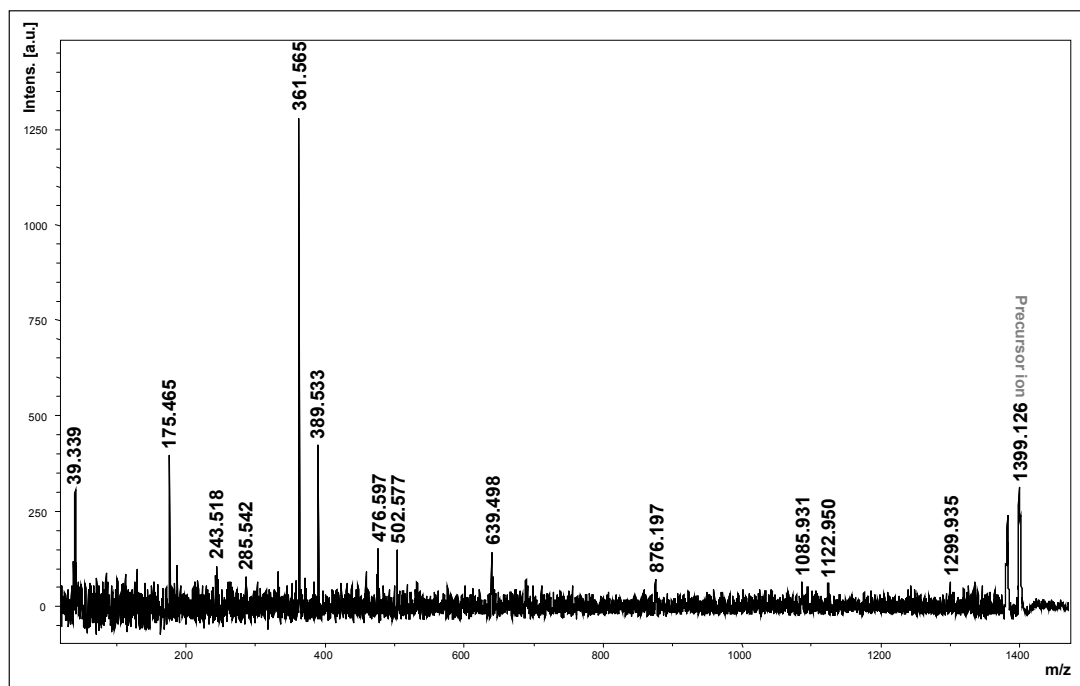

**Figure S1.** MALDI-MS/MS spectra of a tryptic peptide with  $m/z$  1398.9 derived from a  $\sim 55$ kDa band from a protein extract of *C.amadis*.

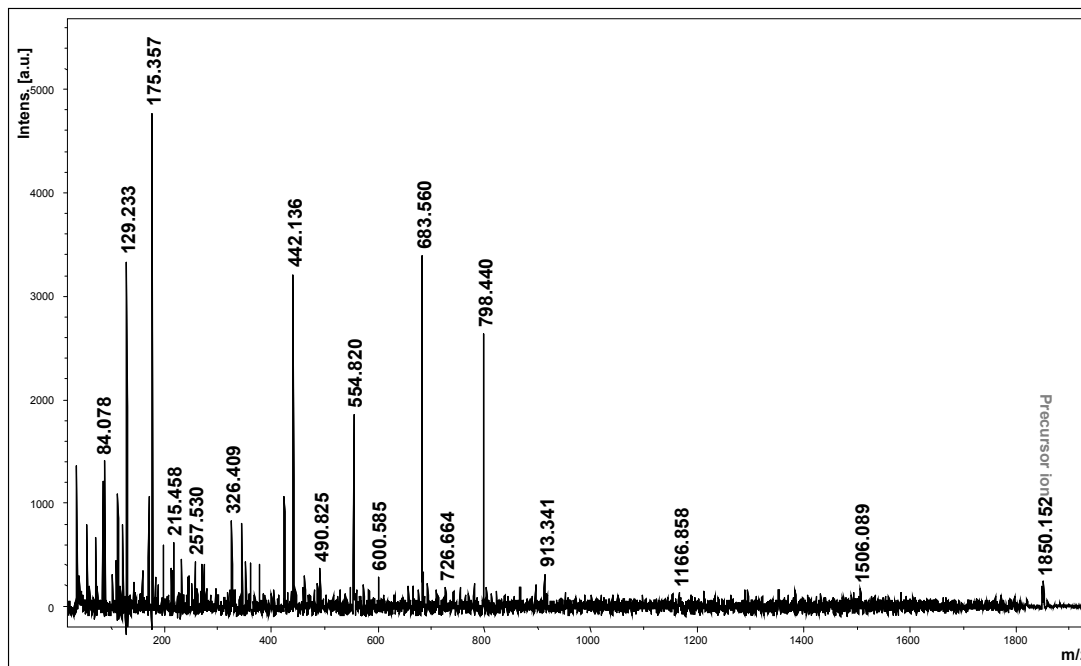

**Figure S2.** MALDI-MS/MS spectra of a tryptic peptide with m/z 1850.3 derived from a ~55kDa band from a protein extract of *C. amadis*.

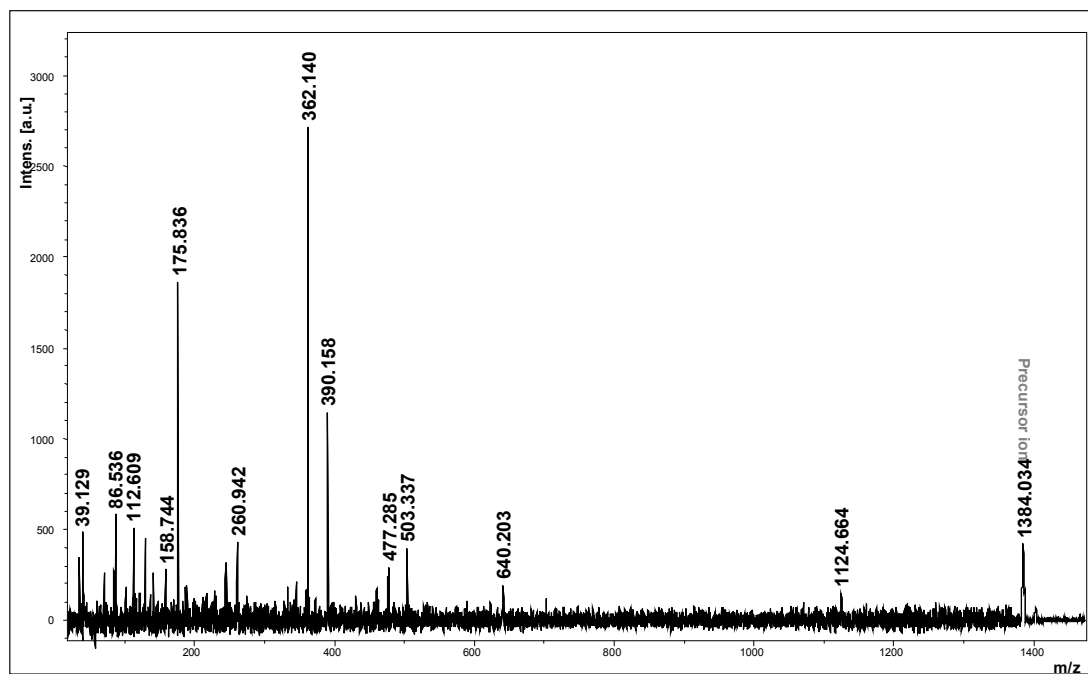

**Figure S3.** MALDI-MS/MS spectra of a tryptic peptide with  $m/z$  1383.9 derived from a  $\sim 55$ kDa band from a protein extract of *C.amadis*.

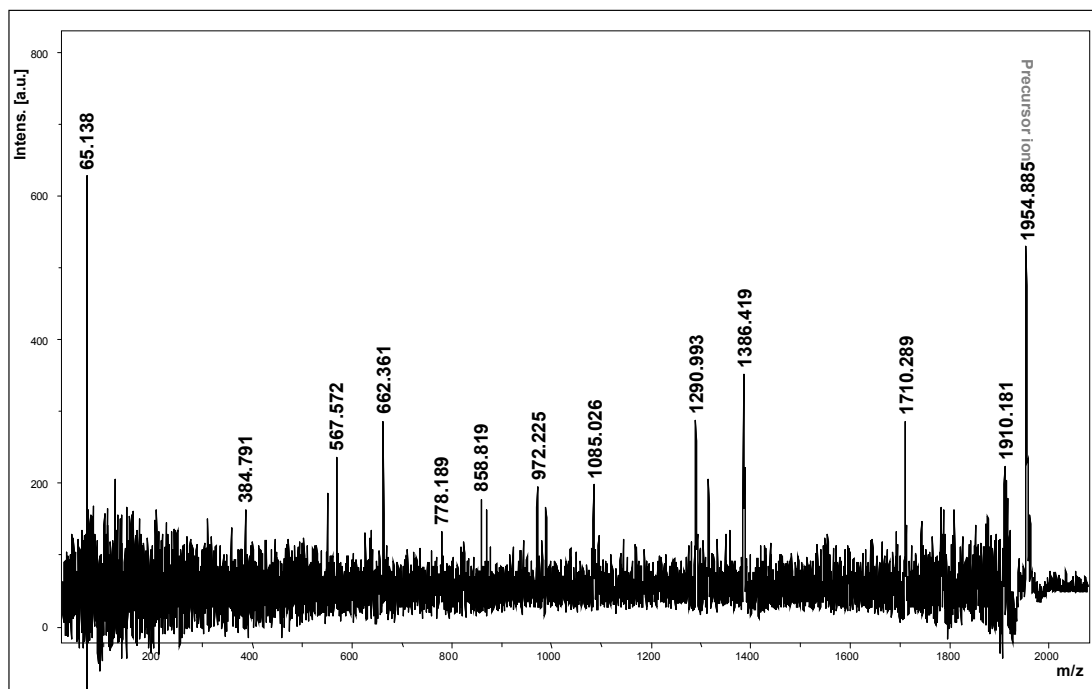

**Figure S4.** MALDI-MS/MS spectra of a tryptic peptide with m/z 1954.3 derived from a ~55kDa band from a protein extract of *C.amadis*.

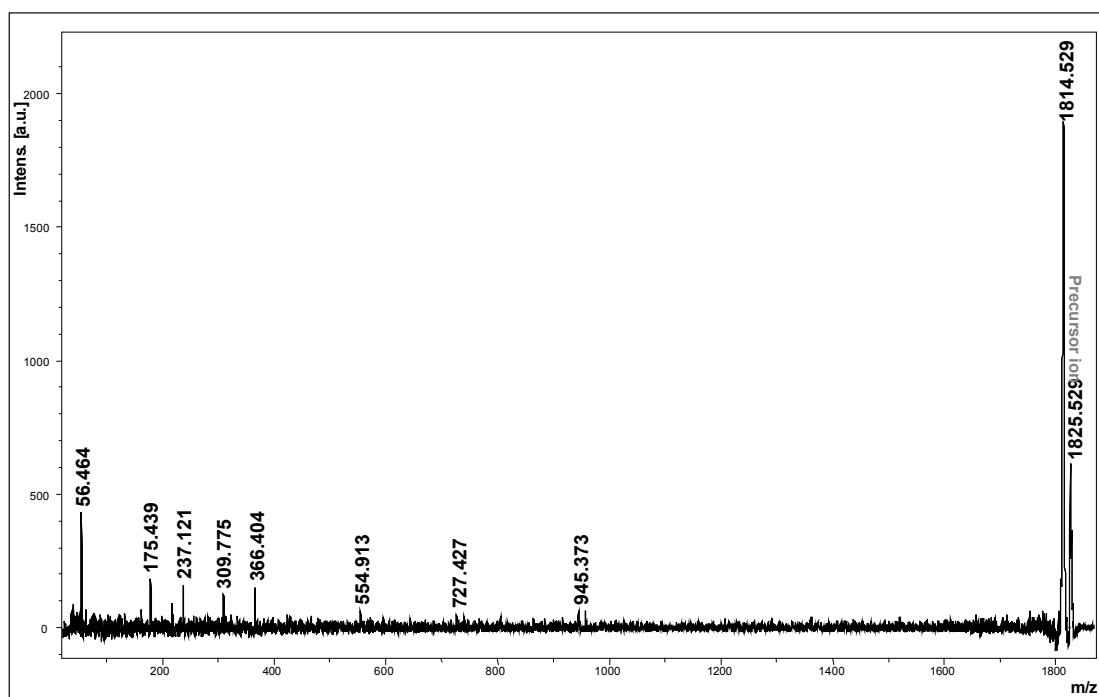

**Figure S5.** MALDI-MS/MS spectra of a tryptic peptide with m/z 1825.2 derived from a ~55kDa band from a protein extract of *C.amadis*.

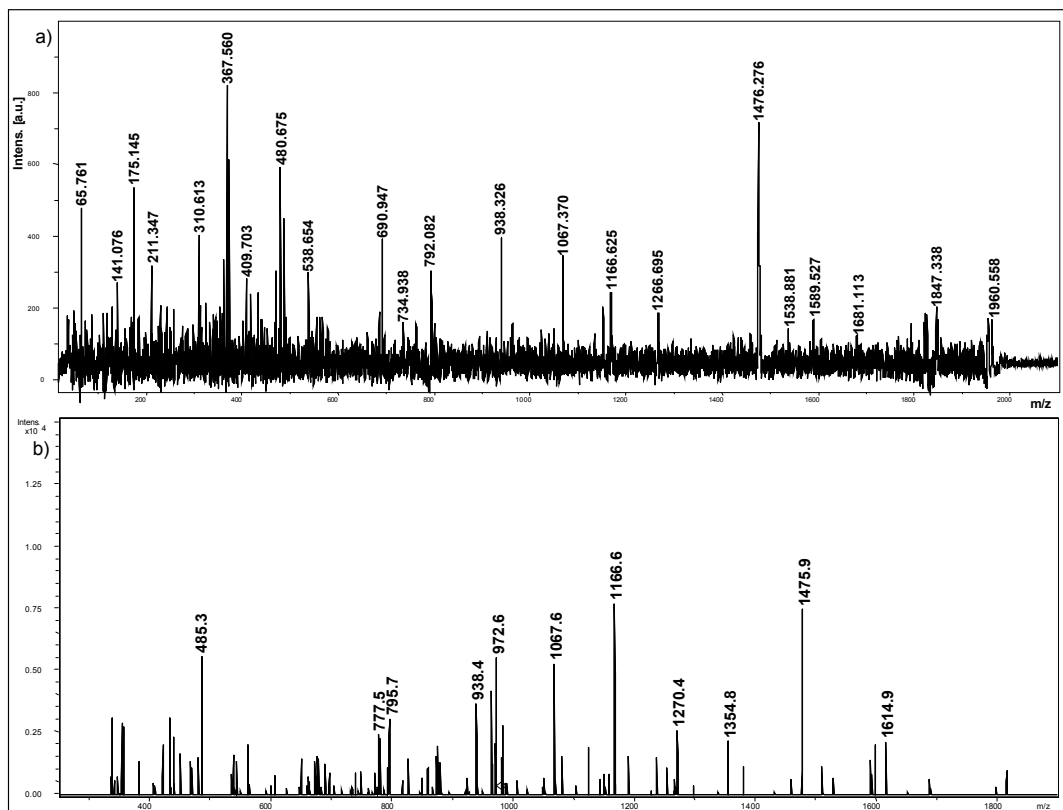

**Figure S6.** a) MALDI-MS/MS spectra of a tryptic peptide with  $m/z$  1960.5 and b) ESI-MS/MS spectra obtained by CID of doubly charge ion ( $m/z$  980.6) derived from a ~55kDa band from a protein extract of *C.amadis*.

**Table S1.** Diverse tetrapeptides derived from different proteins and the resulting BLAST analysis over a non-redundant database.<sup>a</sup>

| SR No. | Tetrapeptide | Protein           | Accession number | E-value | BLAST hit | SR No | Tetrapeptide | Protein            | Accession number | E-value | BLAST hit |
|--------|--------------|-------------------|------------------|---------|-----------|-------|--------------|--------------------|------------------|---------|-----------|
| 1      | ADQR         | Ribonuclease      | NP_774106        | 81660   | -         | 26    | IPER         | Catalase           | NP_001743        | 36802   | -         |
| 2      | AAIK         | "                 | "                | 197267  | -         | 27    | VVWK         | Amidating enzyme   | AAF67216         | 24791   | -         |
| 3      | DHVK         | Hemoglobin        | AAA29796         | 60859   | -         | 28    | TSVK         | Synaptotagmine     | P21521           | 178718  | -         |
| 4      | HSVR         | "                 | "                | 81660   | -         | 29    | ALQR         | RAD51              | CAA45563         | 90553   | -         |
| 5      | EHQK         | "                 | "                | 45357   | -         | 30    | GCQR         | "                  | "                | 32360   | -         |
| 6      | IPVK         | Myoglobin         | NP_976312        | 81660   | -         | 31    | DIAR         | GroEL              | AAR17695         | 76049   | -         |
| 7      | EFFK         | TIM               | P47721           | 33803   | -         | 32    | LQER         | "                  | "                | 55645   | -         |
| 8      | EVTR         | Rhodopsin         | BAB88652         | 81660   | -         | 33    | ECIR         | Kinesin            | BAC06512         | 22824   | -         |
| 9      | YEVK         | PDI               | AAA85099         | 33803   | -         | 34    | YADR         | "                  | "                | 45462   | -         |
| 10     | AAAK         | "                 | "                | 355156  | -         | 35    | DVFR         | "                  | "                | 41092   | -         |
| 11     | LGEK         | "                 | "                | 147018  | -         | 36    | NSDR         | Barnase            | AAC53661         | 70660   | -         |
| 12     | GLQR         | Hydroxylase       | AAO43431         | 109569  | -         | 37    | TGTR         | Shibire            | NP996468         | 100183  | -         |
| 13     | DFHK         | "                 | "                | 33803   | -         | 38    | WFGR         | Glutaminyl cyclase | AAA30549         | 10262   | -         |
| 14     | HCDK         | "                 | "                | 25193   | -         | 39    | WYFR         | "                  | "                | 3911    | -         |
| 15     | LPGK         | DNA polymerase    | P00581           | 147018  | -         | 40    | SDYR         | Peptide isomerase  | AAB34914         | 39975   | -         |
| 16     | GNLK         | Hydroxylase       | AAO43431         | 109569  | -         | 41    | ALFR         | Carboxylase        | AAK97782         | 78895   | -         |
| 17     | EEHK         | Hemoglobin        | AAA29796         | 45357   | -         | 42    | QYAR         | "                  | "                | 36802   | -         |
| 18     | AIVK         | Phosphofruktinase | CAB16429         | 109569  | -         | 43    | CIAR         | "                  | "                | 37142   | -         |
| 19     | IVTK         | Dynamin           | CAA42068         | 109569  | -         | 44    | QWER         | Beta-lactamase     | AAA93528         | 8462    | -         |
| 20     | IVEK         | DNA gyrase        | CAA91553         | 90553   | -         | 45    | LPLR         | "                  | "                | 81849   | -         |
| 21     | LMAR         | "                 | "                | 39975   | -         | 46    | GLSK         | Alpha-synuclin     | NP_000336        | 246503  | -         |
| 22     | NVYK         | Shibire           | NP996468         | 54133   | -         | 47    | GGGR         | Prion protein      | NP991149         | 147359  | -         |
| 23     | LNFK         | Synaptotagmine    | P21521           | 78895   | -         | 48    | SLQR         | Tubulin            | BAA36504         | 79624   | -         |
| 24     | ENGR         | Amidating enzyme  | AAF67216         | 71312   | -         | 49    | AEVK         | GFP                | AAA69675         | 176344  | -         |
| 25     | FHYK         | Catalase          | NP_001743        | 21799   | -         | 50    | TLGR         | Lysozyme           | NP631919         | 176344  | -         |

a) The reported E-values are based on the database on 22<sup>nd</sup> December 2006.

The derived confidence parameter (P) is  $0/50 = 0$

**Table S2.** Diverse pentapeptides derived from different proteins and the resulting BLAST analysis over a non-redundant database.<sup>a</sup>

| SR No. | Pentapeptide | Protein            | Accession number | E-value | BLAST hit | SR No | Pentapeptide | Protein            | Accession number | E-value | BLAST hit |
|--------|--------------|--------------------|------------------|---------|-----------|-------|--------------|--------------------|------------------|---------|-----------|
| 1      | ICLSK        | Ribonuclease       | NP_774106        | 9715    | -         | 26    | QSEQK        | Synaptotagmine     | P21521           | 14456   | -         |
| 2      | DIQFR        | "                  | "                | 4022    | -         | 27    | DVGHR        | Amidating enzyme   | AAF67216         | 10773   | -         |
| 3      | GDVEK        | Cytochrome C       | NP_061820        | 17491   | -         | 28    | AWGEK        | "                  | "                | 5984    | -         |
| 4      | IFIMK        | "                  | "                | 2234    | -         | 29    | EFGPR        | "                  | "                | 8029    | -         |
| 5      | ELCMK        | Hemoglobin         | AAA29796         | 2234    | -         | 30    | GFAVK        | Catalase           | NP_001743        | 26026   | -         |
| 6      | VGTSK        | "                  | "                | 42254   | -         | 31    | VWPHK        | "                  | "                | 1579    | -         |
| 7      | ENFTK        | "                  | "                | 7241    | -         | 32    | MLQGR        | "                  | "                | 3480    | -         |
| 8      | SLAPK        | TIM                | P47721           | 31491   | -         | 33    | IEGSK        | GroEL              | AAR17695         | 18869   | -         |
| 9      | FDEGR        | PDI                | AAA85099         | 7241    | -         | 34    | IHQIK        | "                  | "                | 3610    | -         |
| 10     | DDTWR        | Chymotrypsin       | CAA74031         | 1665    | -         | 35    | RPLNK        | Kinesin            | BAC06512         | 10010   | -         |
| 11     | VAAGK        | "                  | "                | 56695   | -         | 36    | GQDTR        | "                  | "                | 8562    | -         |
| 12     | GCNTR        | "                  | "                | 7241    | -         | 37    | MAGCR        | Glutaminyl cyclase | AAA30549         | 3032    | -         |
| 13     | GICSR        | Hydroxylase        | AAO43431         | 9715    | -         | 38    | HLASK        | "                  | "                | 23960   | -         |
| 14     | LEGIK        | "                  | "                | 17491   | -         | 39    | IVGGK        | Peptide isomerase  | AAB34914         | 21068   | -         |
| 15     | VGHER        | "                  | "                | 9715    | -         | 40    | LELSK        | "                  | "                | 30147   | -         |
| 16     | DHFIR        | "                  | "                | 2997    | -         | 41    | DTGER        | Carboxylase        | AAK97782         | 10973   | -         |
| 17     | LQLNR        | DNA polymerase     | P00581           | 9715    | -         | 42    | LELQK        | "                  | "                | 16440   | -         |
| 18     | VLATR        | Phosphofructkinase | CAB16429         | 23470   | -         | 43    | SNGEK        | Subtilisin         | AAC63365         | 23096   | -         |
| 19     | HMADR        | Dynamin            | CAA42068         | 2997    | -         | 44    | AAVDK        | "                  | "                | 36228   | -         |
| 20     | MCTAK        | "                  | "                | 4022    | -         | 45    | LSASK        | Beta-lactamase     | AAA93528         | 53780   | -         |
| 21     | ASMDK        | DNA gyrase         | CAA91553         | 10773   | -         | 46    | SIPTK        | "                  | "                | 13680   | -         |
| 22     | YSEGR        | "                  | "                | 10773   | -         | 47    | DQLGK        | Alpha-synuclin     | NP_000336        | 16899   | -         |
| 23     | ASFLR        | Shibire            | NP996468         | 19396   | -         | 48    | QLIFK        | Hexokinase         | P50506           | 6560    | -         |
| 24     | EEMLR        | "                  | "                | 3324    | -         | 49    | EDIFK        | Tubulin            | BAA36504         | 6280    | -         |
| 25     | GVDMK        | Synaptotagmine     | P21521           | 8029    | -         | 50    | GSQGR        | Protease           | CAD36507         | 15416   | -         |

a) The reported E-values are based on the database on 22<sup>nd</sup> December 2006.

The derived confidence parameter (P) is  $0/50 = 0$



**Table S3.** Diverse hexapeptides derived from different proteins and the resulting BLAST analysis over a non-redundant database.<sup>a</sup>

| SR No. | Hexapeptide | Protein            | Accession number | E-value | BLAST hit | SR No | Hexapeptide | Protein            | Accession number | E-value | BLAST hit |
|--------|-------------|--------------------|------------------|---------|-----------|-------|-------------|--------------------|------------------|---------|-----------|
| 1      | YIPGTK      | Cytochrome C       | NP_061820        | 1109    | +         | 26    | SFGAGR      | Amidating enzyme   | AAF67216         | 9635    | -         |
| 2      | SLEHAK      | Hemoglobin         | AAA29796         | 2679    | -         | 27    | FSADGK      | "                  | "                | 3988    | -         |
| 3      | DPFFIK      | "                  | "                | 459     | -         | 28    | TDQGIK      | Catalase           | NP_001743        | 2215    | +         |
| 4      | SEDEMK      | Myoglobin          | NP_976312        | 616     | -         | 29    | VANYQR      | "                  | "                | 917     | -         |
| 5      | ASEDLK      | "                  | "                | 3594    | -         | 30    | TDFSGR      | RAD51              | CAA45563         | 2215    | -         |
| 6      | ALELFR      | "                  | "                | 1488    | -         | 31    | QMHLAK      | "                  | "                | 683     | -         |
| 7      | NLLENK      | TIM                | P47721           | 1488    | -         | 32    | QIVVQK      | GroEL              | AAR17695         | 1651    | -         |
| 8      | LLCTVK      | Rhodopsin          | BAB88652         | 1488    | -         | 33    | GASANK      | Kinesin            | BAC06512         | 9635    | -         |
| 9      | AAHVLK      | PDI                | AAA85099         | 3594    | -         | 34    | ISVCVR      | "                  | "                | 1230    | -         |
| 10     | EDSPIK      | "                  | "                | 1488    | -         | 35    | LTMVLR      | "                  | "                | 917     | -         |
| 11     | GYPTLK      | "                  | "                | 1488    | -         | 36    | QFEQSK      | Barstar            | P11540           | 1230    | -         |
| 12     | DSLLPK      | Chymotrypsin       | CAA74031         | 2679    | -         | 37    | MEWDER      | Protease           | CAD36507         | 65      | -         |
| 13     | FANWIR      | Trypsin            | AAA29340         | 190     | -         | 38    | YADALR      | "                  | "                | 917     | -         |
| 14     | LLDQNR      | Hydroxylase        | AAO43431         | 1109    | -         | 39    | ELGLLK      | Glutaminyl cyclase | AAA30549         | 3988    | -         |
| 15     | EFHLPR      | DNA polymerase     | P00581           | 459     | -         | 40    | DHSSER      | "                  | "                | 1651    | -         |
| 16     | GLLENR      | Phosphofructkinase | CAB16429         | 1996    | -         | 41    | SILHTK      | Peptide isomerase  | AAB34914         | 2215    | -         |
| 17     | LVPEER      | "                  | "                | 1996    | -         | 42    | WAHNAK      | Carboxylase        | AAK97782         | 509     | -         |
| 18     | MACDEK      | Dynamain           | CAA42068         | 342     | +         | 43    | DVISEK      | Subtilisin         | AAC63365         | 2215    | -         |
| 19     | QVETIR      | "                  | "                | 1996    | -         | 44    | EVGEVR      | Beta-lactamase     | AAA93528         | 2215    | -         |
| 20     | NYQEAK      | BSA                | CAA76847         | 826     | -         | 45    | WDGKPR      | "                  | "                | 380     | -         |
| 21     | ILNYEK      | DNA gyrase         | CAA91553         | 1651    | +         | 46    | MDVFMK      | Alpha-synuclin     | NP_000336        | 157     | +         |
| 22     | VGSEIK      | "                  | "                | 3988    | -         | 47    | GGGFGR      | Prion protein      | NP991149         | 5352    | -         |
| 23     | EVEEFK      | Shibire            | NP996468         | 917     | -         | 48    | VPDDIK      | Hexokinase         | P50506           | 1230    | -         |
| 24     | NIHGIR      | "                  | "                | 917     | +         | 49    | DQDLSK      | "                  | "                | 2215    | -         |
| 25     | MPPNAK      | Synaptotagmine     | P21521           | 683     | -         | 50    | YIVGFK      | Subtilisin         | AAC63365         | 917     | -         |

a) The reported E-values are based on the database on 22<sup>nd</sup> December 2006.

The derived confidence parameter (P) is  $6/50 = 0.12$

**Table S4.** Diverse octapeptides derived from different proteins and the resulting BLAST analysis over a non-redundant database.<sup>a</sup>

| SR No. | Octapeptide | Protein           | Accession number | E-value | BLAST hit | SR No | Octapeptide | Protein            | Accession number | E-value | BLAST hit |
|--------|-------------|-------------------|------------------|---------|-----------|-------|-------------|--------------------|------------------|---------|-----------|
| 1      | ADLIAYLK    | Cytochrome C      | NP_061820        | 32      | +         | 26    | HDQIGEVK    | Synaptotagmine     | P21521           | 20      | +         |
| 2      | QDGIDLYK    | He moglobin       | AAA29796         | 13      | +         | 27    | IAIMQNGK    | "                  | "                | 15      | +         |
| 3      | TTLDEPTK    | "                 | "                | 32      | +         | 28    | THAHGLGK    | Amidating enzyme   | AAF67216         | 65      | +         |
| 4      | HAWQEIGK    | "                 | "                | 5.5     | +         | 29    | GNLYVFHR    | "                  | "                | 8.3     | +         |
| 5      | GHPETLEK    | Myoglobin         | NP_976312        | 24      | +         | 30    | DAQIFIQK    | Catalase           | NP_001743        | 15      | +         |
| 6      | ALAPEYAK    | PDI               | AAA85099         | 43      | +         | 31    | TGAQIVYK    | GroEL              | AAR17695         | 36      | +         |
| 7      | DTESADAK    | "                 | "                | 78      | -         | 32    | FTAAPLVK    | Kinesin            | BAC06512         | 65      | +         |
| 8      | ILEFFGLK    | "                 | "                | 18      | -         | 33    | MLEQPQYR    | "                  | "                | 2.5     | +         |
| 9      | QLMPTWDK    | "                 | "                | 1.7     | +         | 34    | NSSHVPFR    | "                  | "                | 20      | +         |
| 10     | IHPNYNSR    | Trypsin           | AAA29340         | 5.5     | +         | 35    | LPDNYITK    | Barnase            | AAC3661          | 11      | +         |
| 11     | AESSELVR    | Hydroxylase       | AAO43431         | 78      | +         | 36    | YFVCNYYK    | Protease           | CAD36507         | 1.1     | +         |
| 12     | YDVPALTK    | DNA polymerase    | P00581           | 24      | +         | 37    | YFPHWDDR    | Glutaminyl cyclase | AAA30549         | 0.59    | +         |
| 13     | DTDMGLLR    | "                 | "                | 13      | +         | 38    | TTIDNLNK    | "                  | "                | 27      | +         |
| 14     | VPLEDAVR    | Phosphofruktinase | CAB16429         | 32      | +         | 39    | HYPGVYMK    | Peptide isomerase  | AAB34914         | 2.5     | +         |
| 15     | FSSFDEIR    | Dynamain          | CAA42068         | 13      | +         | 40    | WGDDEACR    | Carboxylase        | AAK97782         | 3.4     | +         |
| 16     | QMIFQFIR    | "                 | "                | 1.7     | +         | 41    | MHYMSMYR    | "                  | "                | 0.24    | +         |
| 17     | DDSPDLPK    | BSA               | CAA76847         | 24      | +         | 42    | FWLEDQLR    | Beta-lactamase     | AAA93528         | 2.5     | +         |
| 18     | TEEMLVEK    | DNA polymerase    | P00581           | 10      | +         | 43    | FALPENMR    | Hexokinase         | P50506           | 6.2     | +         |
| 19     | SPYGEQCR    | "                 | "                | 7.4     | +         | 44    | DFDTTQSK    | "                  | "                | 27      | +         |
| 20     | VIDFTGER    | PDI               | AAA85099         | 18      | +         | 45    | LAELIGER    | "                  | "                | 48      | +         |
| 21     | LGNSEVVK    | DNA gyrase        | CAA91553         | 87      | +         | 46    | TTVLDVMR    | Tubulin            | BAA36504         | 15      | +         |
| 22     | ILANEEIR    | "                 | "                | 20      | +         | 47    | NVMVSTGR    | "                  | "                | 27      | +         |
| 23     | GYIGVVNR    | Shibire           | NP996468         | 27      | +         | 48    | EAFMEQFR    | "                  | "                | 3.4     | +         |
| 24     | NLVDSYMK    | "                 | "                | 8.3     | +         | 49    | EAFSLFDK    | Calmodulin         | MCKKA            | 27      | +         |
| 25     | AAEAASQR    | Synaptotagmine    | P21521           | 156     | +         | 50    | NAIHNHIR    | Huntingtin         | NP002102         | 8.3     | +         |

a) The reported E-values are based on the database on 22<sup>nd</sup> December 2006.

The derived confidence parameter (P) is 48/50 = 0.96

**Table S5.** Diverse decapeptides derived from different proteins and the resulting BLAST analysis over a non-redundant database.<sup>a</sup>

| SR No. | Decapeptide | Protein       | Accession number | E-value | BLAST hit | SR No | Decapeptide | Protein           | Accession number | E-value | BLAST hit |
|--------|-------------|---------------|------------------|---------|-----------|-------|-------------|-------------------|------------------|---------|-----------|
| 1      | HGTCSEGLADR | Ribonuclease  | NP_774106        | 0.66    | +         | 26    | HWSDMLASPR  | Synaptotagmine    | P21521           | 0.052   | +         |
| 2      | HMFEHYPPAMK | Hemoglobin    | AAA29796         | 0.008   | +         | 27    | TLVLQVHYAK  | Amidating enzyme  | AAF67216         | 0.41    | +         |
| 3      | ENYTPADVQK  | "             | "                | 0.20    | +         | 28    | DLFNAIATGK  | Catalase          | NP_001743        | 0.98    | +         |
| 4      | HMFEHYPPMR  | "             | "                | 0.002   | +         | 29    | LCENIAGHLK  | "                 | "                | 0.30    | +         |
| 5      | SHQHLTEAEK  | "             | "                | 0.37    | +         | 30    | VGAATEVEMK  | GroEL             | AAR17695         | 0.73    | +         |
| 6      | TYQVCATQLK  | TIM           | P47721           | 0.20    | +         | 31    | TLQASTAVNR  | Kinesin           | BAC06512         | 1.8     | +         |
| 7      | DAASIVAWLK  | PDI           | AAA85099         | 0.49    | +         | 32    | SHAIFQILR   | "                 | "                | 0.23    | +         |
| 8      | LISLEEDMTK  | "             | "                | 0.20    | +         | 33    | SIGGDIFSNR  | Barnase           | AAC3661          | 0.73    | +         |
| 9      | DGAGLSDEEK  | "             | "                | 1.6     | +         | 34    | TTDHYQFTFK  | "                 | "                | 0.13    | +         |
| 10     | LWTNGPIADK  | Chymotrypsin  | CAA74031         | 0.15    | +         | 35    | SISDLHQTLK  | Barstar           | P11540           | 0.73    | +         |
| 11     | TLDNDIAIMR  | Trypsin       | AAA29340         | 0.42    | +         | 36    | DPEETDEILK  | Synaptotagmine    | P21521           | 0.23    | +         |
| 12     | SGGPPSEQLR  | "             | "                | 0.11    | +         | 37    | IVLHPGYKPK  | Peptide isomerase | AAB34914         | 0.23    | +         |
| 13     | QALFQQEMAR  | Hydroxylase   | AAO43431         | 0.11    | +         | 38    | VSSYTNWMSK  | "                 | "                | 0.07    | +         |
| 14     | QTNGTADPER  | Epsin         | AAW34263         | 0.49    | +         | 39    | LFGFSLSDLK  | Carboxylase       | AAK97782         | 0.98    | +         |
| 15     | TCAAFTDFGR  | "             | "                | 0.27    | +         | 40    | GFLDPQAWSK  | "                 | "                | 0.17    | +         |
| 16     | CVFISIFNEK  | "             | "                | 0.084   | +         | 41    | QTMSTMSAAK  | Subtilisin        | AAC63365         | 0.41    | +         |
| 17     | EESDQAGLDK  | Enolase       | CAJ03181         | 0.89    | +         | 42    | HPNWTNTQVR  | "                 | "                | 0.039   | +         |
| 18     | MGSEVYHALK  | "             | "                | 0.20    | +         | 43    | DNFDEMDTSR  | Tubulin           | BAA36504         | 0.07    | +         |
| 19     | NLVSASQDGK  | G-protein     | CAA35532         | 2.1     | +         | 44    | LSEQQIAEFK  | Calmodulin        | MCCKA            | 0.41    | +         |
| 20     | AGVLAGHDNR  | "             | "                | 1.2     | +         | 45    | WCDDGTPGGK  | Lysozyme          | NP631919         | 0.13    | +         |
| 21     | EGLTAVISVK  | DNA gyrase    | CAA91553         | 2.4     | +         | 46    | GAHHTGGLK   | Huntingtin        | NP002102         | 0.55    | +         |
| 22     | GISNIPINLR  | Shibire       | NP996468         | 0.41    | +         | 47    | CVEEILGYLK  | "                 | "                | 0.17    | +         |
| 23     | HFQPGDASIK  | "             | "                | 0.41    | +         | 48    | EGALDAVLER  | MutS              | AAC43637         | 1.3     | +         |
| 24     | LSPPSPGGVR  | "             | "                | 1.8     | +         | 49    | QSQHMTEVVR  | p53               | BAC16799         | 0.13    | +         |
| 25     | SLPYADAMNK  | Synaptotagmin | P21521           | 0.23    | +         | 50    | EVHVCACPGR  | "                 | "                | 0.13    | +         |

a) The reported E-values are based on the database on 22<sup>nd</sup> December 2006.

The derived confidence parameter (P) is  $50/50 = 1$

**Table S6.** Diverse unidecapeptides derived from different proteins and the resulting BLAST analysis over a non-redundant database.<sup>a</sup>

| SR No. | Unidecapeptide | Protein                 | Accession number | E-value | BLAST hit | SR No | Unidecapeptide | Protein          | Accession number | E-value | BLAST hit |
|--------|----------------|-------------------------|------------------|---------|-----------|-------|----------------|------------------|------------------|---------|-----------|
| 1      | TGPNLHGLFGR    | Cytochrome C            | NP_061820        | 0.063   | +         | 26    | GQQTILFAWAK    | Amidating enzyme | AAF67216         | 0.021   | +         |
| 2      | EFSHEISHHGK    | Hemoglobin              | AAA29796         | 0.014   | +         | 27    | HMNGYGSHTFK    | Catalase         | NP_001743        | 0.009   | +         |
| 3      | VGLSASTGLYK    | Concannavalin           | CVJB             | 0.37    | +         | 28    | LSQEDPDYGIR    | "                | "                | 0.021   | +         |
| 4      | HCMITTLCCGK    | Rhodopsin               | BAB88652         | 0.002   | +         | 29    | SELICLTTGSK    | RAD51            | CAA45563         | 0.13    | +         |
| 5      | SGKPQEYGGGR    | PDI                     | AAA85099         | 0.11    | +         | 30    | ELVEGLEGDEK    | GroEL            | AAR17695         | 0.093   | +         |
| 6      | DYPCYVTGWGR    | Chymotrypsin            | CAA74031         | 0.002   | +         | 31    | AEVDVITIPSR    | Kinesin          | BAC06512         | 0.069   | +         |
| 7      | VSAYIDWINEK    | "                       | "                | 0.006   | +         | 32    | THTMGGDFSGK    | "                | "                | 0.052   | +         |
| 8      | GGLIVFHNGHK    | DNA polymerase          | P00581           | 0.047   | +         | 33    | SDEEYDEMVEK    | "                | "                | 0.007   | +         |
| 9      | ENCIDTLVLSR    | "                       | "                | 0.026   | +         | 34    | EADINYTSGFR    | Barnase          | AAC3661          | 0.029   | +         |
| 10     | IDNPAAIAELK    | Dehydrogenase           | CAA38581         | 0.084   | +         | 35    | ILYSSDWLIYK    | "                | "                | 0.005   | +         |
| 11     | YCGAGCTQAVK    | Enolase                 | CAJ03181         | 0.035   | +         | 36    | ADVTDAANMLK    | Protease         | CAD36507         | 0.069   | +         |
| 12     | IYAMHWASDSR    | G-protein               | CAA35532         | 0.003   | +         | 37    | YPGSPGSFAAR    | Glutamyl cyclase | AAA30549         | 0.13    | +         |
| 13     | LIVWDSYTTNK    | "                       | "                | 0.008   | +         | 38    | HLVLACHYDSK    | "                | "                | 0.016   | +         |
| 14     | FATGSDDATCR    | "                       | "                | 0.063   | +         | 39    | MASTPHPPGAR    | "                | "                | 0.039   | +         |
| 15     | VLALDAAAFK     | Eps15                   | AAA02912         | 0.27    | +         | 40    | DQLLPQEASPK    | Carboxylase      | AAK97782         | 0.069   | +         |
| 16     | AQLEEQLQEVK    | "                       | "                | 0.035   | +         | 41    | QLTPPTQPTFR    | "                | "                | 0.021   | +         |
| 17     | SEDVPPALPPK    | "                       | "                | 0.063   | +         | 42    | GGGWGGSSSGR    | Prion protein    | NP991149         | 0.41    | +         |
| 18     | FVPIVAEEDGR    | K <sup>+</sup> -channel | BAA23630         | 0.035   | +         | 43    | AGWGAAGGHR     | "                | "                | 0.069   | +         |
| 19     | LQNLLSGPWP     | GPCR                    | NP_683765        | 0.019   | +         | 44    | ITDHFISELEK    | Hexokinase       | P50506           | 0.021   | +         |
| 20     | VDYYLLHETWR    | "                       | "                | 0.001   | +         | 45    | LSICGIAAICK    | "                | "                | 0.052   | +         |
| 21     | SGLEISNLPK     | DNA gyrase              | CAA91553         | 0.23    | +         | 46    | IHEDIFDIIDR    | Tubulin          | BAA36504         | 0.005   | +         |
| 22     | VSVDAAEADK     | "                       | "                | 0.23    | +         | 47    | DYGIFQINSFK    | Lysozyme         | NP631919         | 0.012   | +         |
| 23     | VLNQQLTNHIR    | Shibire                 | NP996468         | 0.021   | +         | 48    | FHVGDWMTIR     | Huntingtin       | NP002102         | 0.003   | +         |
| 24     | AIMMLIINNAK    | "                       | "                | 0.009   | +         | 49    | EGYDPDLALR     | MutS             | AAC43637         | 0.029   | +         |
| 25     | TLVFAIFDFDR    | Synaptotagmine          | P21521           | 0.016   | +         | 50    | LSDADVDQMIK    | Calmodulin       | MCKKA            | 0.029   | +         |

a) The reported E-values are based on the database on 22<sup>nd</sup> December 2006.

The derived confidence parameter (P) is 50/50 = 1

**Table S7.** Diverse random (nontryptic) nonapeptides derived from different proteins and the resulting BLAST analysis over a non-redundant database.<sup>a</sup>

| SR No. | Nonapeptide | Protein   | Accession number | E-value | BLAST hit | SR No | Nonapeptide | Protein    | Accession number | E-value | BLAST hit |
|--------|-------------|-----------|------------------|---------|-----------|-------|-------------|------------|------------------|---------|-----------|
| 1      | SWVMTCAAYA  | G-protein | CAA35532         | 0.29    | +         | 26    | IGCGQSACG   | Protease   | CAD36507         | 5.5     | +         |
| 2      | PSGSFVACG   | "         | "                | 10      | +         | 27    | NNKYFVCNY   | "          | "                | 0.22    | +         |
| 3      | GLDNICSIY   | "         | "                | 1.3     | +         | 28    | YKGTMGDEP   | "          | "                | 1.3     | +         |
| 4      | SLKTREGNV   | "         | "                | 10      | +         | 29    | YQLGRPCSQ   | "          | "                | 1.3     | +         |
| 5      | RVSRELPGH   | "         | "                | 4.1     | +         | 30    | CRSSCQHIR   | "          | "                | 0.71    | +         |
| 6      | TGYLSCCR    | "         | "                | 0.71    | +         | 31    | PALHSQGFT   | Subtilisin | AAC63365         | 5.5     | +         |
| 7      | LDDNQIVTS   | "         | "                | 4.1     | +         | 32    | GSNVKVAVI   | "          | "                | 18      | +         |
| 8      | SGDMTCALW   | "         | "                | 0.53    | +         | 33    | DSGIDSSHP   | "          | "                | 7.4     | +         |
| 9      | DIETGQQCT   | "         | "                | 1.7     | +         | 34    | DLKVAGGAS   | "          | "                | 43      | +         |
| 10     | AFTGHTGDV   | "         | "                | 7.4     | +         | 35    | MVPSETNPF   | "          | "                | 0.95    | +         |
| 11     | VRSADTGKD   | Lysozyme  | NP631919         | 13      | +         | 36    | QDNNSHGTH   | "          | "                | 2.3     | +         |
| 12     | YGIFQINSF   | "         | "                | 0.95    | +         | 37    | VAGTVAALN   | "          | "                | 32      | +         |
| 13     | KWCDDGTPG   | "         | "                | 0.71    | +         | 38    | NSVFVLGVA   | "          | "                | 13      | +         |
| 14     | GKNLCKVAC   | "         | "                | 3.1     | +         | 39    | PSASLYAVK   | "          | "                | 13      | +         |
| 15     | SDLLNDDLK   | "         | "                | 5.5     | +         | 40    | VLGADGSGQ   | "          | "                | 32      | +         |
| 16     | ASVGCALKI   | "         | "                | 13      | +         | 41    | KELGTVMRS   | Calmodulin | MCCKA            | 4.1     | +         |
| 17     | VKMDGLKSW   | "         | "                | 0.95    | +         | 42    | LGQNPSESE   | "          | "                | 7.4     | +         |
| 18     | ETWDSYCNG   | "         | "                | 0.29    | +         | 43    | LTDMINEVD   | "          | "                | 0.95    | +         |
| 19     | RKMSRWVKG   | "         | "                | 0.71    | +         | 44    | VNSDGSIDF   | "          | "                | 5.5     | +         |
| 20     | CEQRKQSLR   | "         | "                | 1.7     | +         | 45    | PEFLTMMAR   | "          | "                | 0.39    | +         |
| 21     | AWSSGDLTF   | Protease  | CAD36507         | 3.1     | +         | 46    | KMKDTDSEA   | "          | "                | 3.1     | +         |
| 22     | LGAVQMWAD   | "         | "                | 0.95    | +         | 47    | EIAEAFKVF   | "          | "                | 7.1     | +         |
| 23     | EIVDFQYGV   | "         | "                | 1.3     | +         | 48    | DRNGDGKIS   | "          | "                | 7.4     | +         |
| 24     | WTDGTGHI    | "         | "                | 0.53    | +         | 49    | AAELRHLLT   | "          | "                | 7.4     | +         |
| 25     | QQVFAGASR   | "         | "                | 10      | +         | 50    | SIGEKLSDA   | "          | "                | 18      | +         |

a) The reported E-values are based on the database on 22<sup>nd</sup> December 2006.

The derived confidence parameter (P) = 50/50 = 1
